# Supplementary material for: Development of the 12-Base Short Dimeric Myogenetic Oligodeoxynucleotide That Induces Myogenic Differentiation
Source: MDPI journal article supplement (doi:10.3390/biotech13020011), 2024-04-25
Supplement: s1 [file s1]

# Supplementary Materials: Development of the 12-Base Short Dimeric Myogenetic Oligodeoxynucleotide That Induces Myogenic Differentiation

Koji Umezawa, Rena Ikeda, Taiichi Sakamoto, Yuya Enomoto, Yuma Nihashi, Sayaka Shinji, Takeshi Shimosato, Hiroshi Kagami and Tomohide Takaya

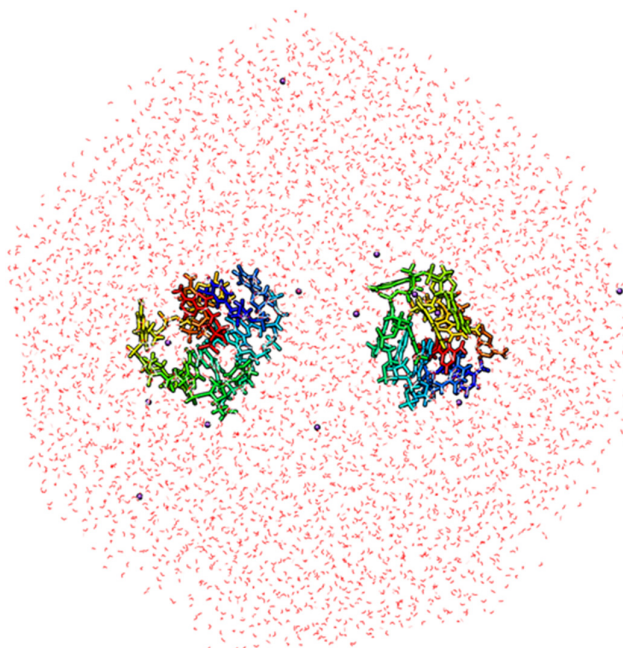

**Supplementary Figure S1.** The simulation system of the iMyo01-DNA dimer. iMyo01-DNA molecules are represented as a rainbow-colored stick model from the 5' to the 3' end. The solvent molecules are shown as red wires (oxygen atoms of water molecules), purple spheres ( $K^+$  ions), and a green sphere ( $Cl^-$  ion).

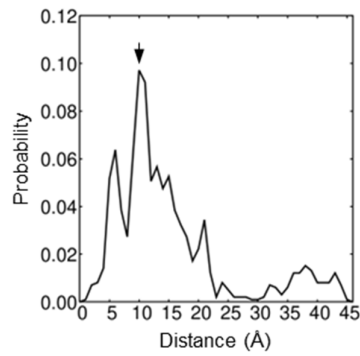

**Supplementary Figure S2.** The probability of the center-of-mass distances between the two iMyo01-DNA molecules. The McMD simulation at 310 K provided 988 conformations as a canonical ensemble. Their center-of-mass distances and probability distribution are shown. The dimer state defined below 25 Å of the distance contains 855 conformations (86.5%), and the separated monomer state contains 133 conformations (13.5%). An arrow indicate the peak at  $d_{\text{com}} \approx 10$  Å.

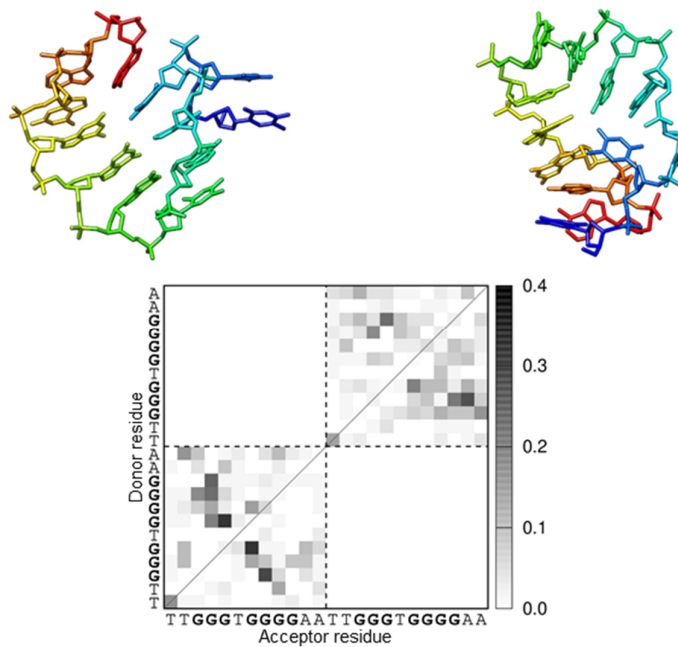

**Supplementary Figure S3.** The representative iMyo01-DNA structure in the separated monomer state. The structures ( $d_{\text{com}}, 37.8$  Å) are shown as a rainbow-colored stick model from the 5' to the 3' end. The hydrogen bond pattern is plotted as a monochrome map. The gray scale indicates the probability of hydrogen bond formation between residues. The two iMyo01-DNA sequences are displayed sequentially on the axes.
